# Supplementary material
Source: publisher figshare collection journal article supplement (https://sage.figshare.com/ndownloader/files/24163632)
Supplement: Supplementary file 1 [file 24163632]

## TAYLOR & FRANCIS LICENSE TERMS AND CONDITIONS

Jun 18, 2020

---

---

This Agreement between Fraunhofer -- Leander Brieskorn ("You") and Taylor & Francis ("Taylor & Francis") consists of your license details and the terms and conditions provided by Taylor & Francis and Copyright Clearance Center.

License Number 4845931023053

License date Jun 11, 2020

Licensed Content Publisher Taylor & Francis

Licensed Content Publication Journal of Adhesion

Licensed Content Title On the Fabrication and Automation of Reliable Bonded Composite Repairs

Licensed Content Author J. Holtmannspötter , J. V. Czarnecki, et al

Licensed Content Date Jan 2, 2015

Licensed Content Volume 91

Licensed Content Issue 1-2

Type of Use Journal/Magazine

Requestor type publisher

Publisher SAGE Publications

Format print and electronic

| Portion                                                                           | Figure/table/questionnaire                                             |
|-----------------------------------------------------------------------------------|------------------------------------------------------------------------|
| Number of figures/tables<br>/questionnaires                                       | 2                                                                      |
| Will you be translating?                                                          | no                                                                     |
| Circulation                                                                       | 1                                                                      |
| Does Taylor & Francis<br>material represent<br>more than 20% of<br>your new work. | no                                                                     |
| Author of this Taylor &<br>Francis article                                        | no                                                                     |
| Title of new article                                                              | AUTOMATED REMOVAL OF CFRP LAYERS FOR THE<br>REPAIR BY ADHESIVE BONDING |
| Lead author                                                                       | Leander Brieskorn                                                      |
| Title of targeted journal                                                         | Journal of Aerospace Engineering                                       |
| Publisher                                                                         | SAGE Publications                                                      |
| Expected publication date                                                         | Oct 2020                                                               |
| Portions                                                                          | 18, 19                                                                 |
|                                                                                   | Fraunhofer<br>Ottenbecker Damm 12                                      |
| Requestor Location                                                                | Stade, 21684<br>Germany<br>Attn: Fraunhofer                            |
| Total                                                                             | 0.00 EUR                                                               |

## Terms and Conditions

**COPYRIGHT LICENSE TERMS AND CONDITIONS (PERMISSIONS)**

1. Informa UK Ltd, trading as Taylor & Francis Group, of 5 Howick Place, London SW1P 1WG ("Us, We, Our") hereby offer you permission to use the licensed products or content (the "**Product(s)**") as set out in the details of use you specified during the order process and are found in the order details above and always subject to and in accordance with these terms and conditions (the "**Terms**").
2. This permission does not cover any third party copyrighted work which may appear in the material for which the permission is requested.
3. Full acknowledgement must be included showing article title, author, full Journal title, date of publication and publisher, reprinted by permission of the publisher (Taylor & Francis Ltd, <http://www.tandfonline.com> ).
4. All reasonable efforts must be made to contact the author(s) to notify them of your intentions and confirm they are happy with the permission being granted.
5. No alterations may be made to our work without written consent.
6. Permission is valid only when payment has been received by the Copyright Clearance Center.
7. Permission is granted by Copyright Clearance Center Inc (CCC) on Taylor and Francis's behalf and by agreeing to the terms and conditions listed above you also agree to (CCC's) additional terms and conditions as the administrators of this licensing service, these terms and conditions are agreed to as a condition of establishing an account and may be seen at any time at <http://myaccount.copyright.com>.
8. This license is granted strictly according to the details of use you specified during the order process and are found in the order details above.
9. In addition, the following terms apply to the particular use specified below:
  - a. **Additional Terms and Conditions for Reuse in a Book/Textbook, Journal/Magazine, Promotional Materials/Pamphlet/Brochure, Newspaper and Newsletter**
    - i. Permission is granted for a fee for non-exclusive world rights for one edition only. Use beyond this edition requires obtaining another license. This license is granted strictly according to the details of use you specified during the order process and are found in the order details above.
    - ii. Unless otherwise stated, entire article electronic reuse is excluded with the exception of eBooks.
    - iii. This license does not cover usage in a Custom Publishing Products and or database. This license does not cover individual chapter sales.
    - iv. This license does not cover cases in which Taylor and Francis material consists of more than 20% of your new work.
    - v. The following terms only apply to signatories of the International Association of Scientific, Technical and Medical (STM) Publishers guidelines. <http://www.stm-assoc.org/about-stm>. Taylor and Francis

adhere to STM guidelines, providing some reuse licenses for free as specified in the guidelines. We are pleased to grant you non-exclusive world rights in English and in all languages, in print and electronic editions of this Work in its first and future editions and revisions, on the following conditions:

The original source of publication and Taylor & Francis Ltd., are acknowledged in the caption, including a reference to the Journal's web site: Taylor & Francis Ltd, <http://www.tandfonline.com>

You do not license to any third-party permission to reproduce this copyrighted material, in any form, and at any time.

**b. Additional Terms and Conditions to reproduce a T&F title in a T&F imprint**

- i. Permission is granted without charge for non-exclusive world for one edition only. Use beyond this edition requires obtaining another license.
- ii. Your use is limited to use within an Taylor & Francis title.

**c. Additional Terms and Conditions to Post on a Website**

- i. Permission is granted for a fee for non-exclusive world rights for this usage only. Permission must therefore be obtained for any further use.
- ii. For text extracts permission is limited to a maximum of 500 words or 1 page. Taylor and Francis do not allow full articles to appear on third party web sites.

**d. Additional Terms and Conditions to reuse in Library Reserve/e-Reserve**

- i. Permission is granted for a fee to reproduce the entire article for use by an educational institution.
- ii. Use in an Electronic Reserve must be password protected

**e. Additional Terms and Conditions to reuse in a Course pack/Classroom Materials**

- i. Permission is limited to non-exclusive world rights.
- ii. Electronic course packs must be used on a secure website.
- iii. Permission is granted for a period of 12 months from date the course commences.

**f. Additional Terms and Conditions for Corporate Permissions Requests**

- i. Permission is granted for a fee for non-exclusive world rights for this usage only. Permission must therefore be obtained for any further use.
- ii. Corporate requests are defined as requests with the following requestor types in the order details of the license: pharmaceutical, biotech, or medical device company; agency acting on behalf of a pharma company; commercial/for-profit
- iii. Permission is granted for a period of 12 months from the license date ("Term").
- iv. The Products shall not be used in any manner that may be considered by Us (acting in Our sole discretion) as derogatory to the title, content and/or authors of the Products
- v. You warrant that the Products shall not be used in any manner which may limit Our ability and/or that of its owners, successors or assignees to exploit the Products in any way whether for financial gain or any other benefit.

- vi. Upon expiration of the Term for any reason whatsoever, you agree to immediately cease using the Products and permanently delete and remove the Products from your works, systems and any publication, system or database.
- vii. You hereby confirm that neither Us, nor any of Our group companies nor Our or their respective officers, employees and/or agents will be responsible for any liability, costs, damages or expenses incurred by you or any third party in connection with your use of the Products.
- viii. The rights granted to you under these Terms may be revoked by Us at any time if you breach any of the Terms or if We, acting in Our reasonable discretion, have reasonable grounds to believe that you may breach any of the Terms. Following any such revocation, your rights to use the Products shall immediately cease and you shall have no further rights in respect of the Products.

These Terms shall be governed by and construed in accordance with English law and both parties shall submit to the exclusive jurisdiction of the courts of England in respect of any dispute arising out of or in connection with these Terms or the Products.

**Other Conditions:**

Version 1.10

**Questions? [customercare@copyright.com](mailto:customercare@copyright.com) or +1-855-239-3415 (toll free in the US) or +1-978-646-2777.**
